# Supplementary material
Source: publisher figshare collection journal article supplement (https://tandf.figshare.com/ndownloader/files/15169079)
Supplement: Supplementary file 1 [file 15169079]

**Supplementary information for “Comparison of aerosol measurement systems during the 2016 airborne ARISTO campaign”**

John Ortega, Jefferson R. Snider, James N. Smith, J. Michael Reeves

This supplement provides additional information for the aerosol measurements made during the 2016 ARISTO campaign based out of the National Center for Atmospheric Research – Research Aviation Facility.

Section S1: Scanning mobility particle sizer (SMPS)

This section provides additional details regarding the NCAR SMPS developed for aircraft use. The air flow through the DMA in an SMPS system consists of the sheath air and polydispersed aerosol flow going into the DMA and excess air and monodispersed aerosol flow exiting. In a ground-based SMPS, the sheath and excess are balanced and typically controlled by recirculating blowers that push air through HEPA filters to remove all particles. The sheath air uniformly transports the particles from the polydispersed flow in the entrance region to the exit port and partially determines the mobility diameter at each DMA voltage. Because of the significant volume of a recirculating blower system, its use is not practical in aircraft applications where altitude changes cause transient pressure conditions to which the blower would need to adjust by taking or removing air from the polydispersed air to keep the flow constant until a new steady state is reached. This would lead to errant data during these adjustment times. The SMPS system here uses a single flow controller (Alicat Scientific, Inc., model MCR-50SLPM-D) for the sheath flow (brought in with the aerosol flow) to bring the system to steady state as quickly as possible during altitude changes. The outlet monodispersed and DMA excess flows are determined by two critical orifices, and the proper split of the inlet flow between polydispersed and sheath flow is determined using a 0.43 mm flow restrictor in the polydispersed flow branch (labeled “0.43” in Fig. 1) and the flow controller mentioned above. The CPC used for counting particles is a commercial model 3010 particle counter (TSI, Inc.) that was modified for reduced pressure operation according to the recommendations provided by Hermann and Wiedensohler (2001) and in Seifert et al. (2004). The original 1 L min-1 critical orifice was replaced by removing the small plastic insert in the downstream side of the optics block and adding the 0.28 mm orifice to the plumbing outside of the CPC itself. The downstream pressure tap was also re-routed to be outside of the CPC on the vacuum side of the critical orifice. The pressure difference across this orifice was read and recorded by the Labview (National Instruments Corp.) control software using RS-232 communication. Another modification to the standard model 3010 was that the temperature difference between the saturator region and condenser region was changed from the default 17 °C to 25 °C, which reduces the minimum detectable particle size at 200 hPa from ~10 nm to ~5 nm (Hermann and Wiedensohler, 2001). Two other differential pressure measurements are made in the system (labeled P1 and P2 in Figure 1) to monitor and record the pressure difference across the polydisperse aerosol orifice (P1) and the difference across the excess flow orifice (P2). The two restrictors (labeled 0.28 and 0.64 upstream of the pump in Figure 1) act as critical orifices to control the total flow exiting the DMA to 3.2 L min-1. The flow restrictor labeled 0.43 provides a slight amount of upstream pressure and reduces the flow into this branch of the DMA relative to the sheath flow. Laboratory tests demonstrated that this was the best choice to ensure that the sheath:polydisperse flow remained at 5:1 throughout the expected pressure range. The pump system consists of 3 dual-stage diaphragm pumps (KNF Neuberger, Inc., model N838, 24V DC) in which the first 2 upstream pumps are plumbed in parallel, and these are connected in series to the third pump.

The three differential pressure sensors, together with the flow and absolute pressure reading from the sheath flow controller, are used to completely characterize the SMPS flows as a function of pressure. Laboratory tests using inline flow meters were performed to obtain these empirical relationships. These reduced pressure tests simulated altitudes between ~1700 m MSL (636 torr) and 10,000 m MSL (200 torr). The results of these flow tests are shown in Figure S2. It is important to ensure that, at each pressure, the flows in and out of the DMA are balanced. That is the reason for checking the sum to be zero (black pentagrams in Figure S2). As can be seen, the system’s air flow is properly maintained over a broad range of pressures. There are small decreases in sheath flow (~4%) and poly-disperse aerosol flow (~9%) at low pressures, which are accounted for during the data inversion process. Since these tests were done in Boulder, CO (~636 torr ambient pressure), and the experimental set-up only allowed for conditions equal to or below ambient pressure, the values shown at 1 atm are extrapolated and have been verified during low altitude flights near sea level (e.g. NOMADSS in 2013 and ARISTO 2016 RF06; see. Fig. S17).

The SMPS particle size range is dependent on pressure (which varies with altitude), DMA voltage range, and sheath flow rate. This relationship is plotted in Figure S3. The maximum diameter corresponds to a DMA voltage of 3500 V, which is significantly lower than that typically used on a ground-based SMPS (8000-10,000 V). This lower value is necessary to eliminate the possibility of a corona discharge at the lowest expected pressures leading to spurious particle counts and damage to the nylon mesh screen within the DMA. Considering CPC counting efficiency, charging efficiency, voltage limits, and pressure, the practical diameter range for this instrument using the nano DMA is ~7-90 nm at sea level and, 10-180 nm at 10,000 m. With the long column DMA, these diameters are ~9-352 nm and 35-550 nm for the same altitude ranges. In addition to voltage and flow calibrations, the SMPS particle diameters and number concentrations are also calibrated in the laboratory prior to installation on the plane. The mobility diameter is verified by introducing an atomized aqueous solution of ammonium sulfate (50 mg L-1) into a separate nano-DMA configured to select individual between 8 and 100 nm and sampling this aerosol stream with the SMPS. For particle concentrations, the integrated particle concentrations are compared with a TSI 3025 drawing from the same sample stream. An atomized aqueous suspension of polystyrene latex spheres of 80 and100 nm in water are also used to verify SMPS diameters.

The SMPS raw data are recorded using an on-board computer and critical data are also fed into the aircraft data system (ADS) using User Datagram Protocol (UDP) so that they can be viewed in real time from the ground using the NCAR-developed data visualization and analysis software, Aeros. Flight parameters including ambient temperature, ambient pressure, relative humidity, air speed, GPS position, and altitude are read from the ADS and are also saved. The SMPS computer, used for instrument control and data acquisition, is synchronized with the ADS clock so that particle data accurately reflects the same conditions of the rest of the measurements. The one-way scan of particle diameters and counts is adjustable, but for the current study was set to 30 s. Longer scan times provide better counting statistics during uniform sampling conditions, but those conditions are rare when sampling from aircraft. Shorter scan times improve spatial resolution, but the CPC response time limits the data collection frequency. The 30 s scan time allows the CPC to count particles for 2 s for each of the 15 diameter bins, which was found to be the best compromise. In addition to the amount of time required for particles to travel from the inlet to the different instruments, there is an additional plumbing delay between when particles exit the DMA and then counted by the CPC. This lag of approximately 4 seconds is accounted for during data processing to ensure optimal agreement between the end of one “up” voltage scan and the beginning of the following “down” scan. The saved raw data (including CPC counts, counting interval, CPC flow rate, charging efficiency, counting efficiency and penetration efficiency) is inverted during post-processing to obtain the final particle size distributions using the equations in Stolzenburg and McMurry (2008). Since the particle diameters are less than 110 nm, only singly-charged particles are considered using the Fuchs charging efficiency approximation from Wiedensohler (1988). Certain key parameters on the SMPS, such as diameter bins, scan time, sheath flow, or DMA voltage limits, can also be remotely controlled using an encrypted data packet sent from a ground computer, through a satellite link, and back to the ADS (Martin, 2015). This feature is especially useful for flights where there is limited seating space and the SMPS does not have a dedicated operator on board. When using remote control, the SMPS controlling software continuously checks the ADS for any changes to operating parameters and adjusts accordingly before the beginning of the next voltage scan.

Section S2: Ultrafine condensation particle counter

The TSI model 3025 ultra-fine particle counter has been described in detail by Stolzenberg and McMurry (1991) and additional details beyond those in Section 2.5 are listed here, specifically with respect to flow characterization at different altitudes. The instrument has indicating front panel lights that inform the operator if the aerosol or capillary flows are greater or less than the nominal values. As mentioned in section 2.5, the capillary and sheath flows change with altitude and so does the ratio between the two, but the flows cannot be adjusted in flight. As can be expected, a small deviation in capillary flow can lead to a large error in number concentration. For example, if the capillary flow deviates by 5 ml min-1, this is 16.7% of the total 30 ml min-1 with a corresponding error in number concentration, which demonstrates the need to accurately characterize the system flows under changing conditions. Takegawa, Iida and Sakurai (2017) made several modifications to a similar ultrafine CPC (TSI, Inc., model 3776) including the addition of external mass flow meters to measure the capillary and condenser flows, replacing the original internal pump with a larger external pump to improve flow control at reduced pressure, and adjusting the orifice settings for the particle-free sheath air flow. These modifications made it possible to use the instrument in reduced pressure environments in a laboratory setting. More modern instruments such as the TSI model 3756 continuously monitor the capillary flow, so particle concentrations can be calculated more accurately if there are any flow rate deviations.

During the experiments presented here, the TSI 3025 differential pressure readings (which activate the lights mentioned above) for the sheath air and condenser flows were recorded through RS-232 commands. Laboratory tests with inline flow meters were conducted before and after the campaign using a common inlet with the SMPS to derive empirical relationships to predict condenser and sheath flow rates as a function of inlet pressure and these differential pressure measurements. This resulted in accurate measurements of the particle number concentrations, which are calculated from the original raw count rate (particles s-1) divided by the calculated volumetric flow rate (cm3 s-1) of air through the capillary. Figure S4 shows the results of these derived flow rates during RF06, which was a flight from Colorado to the US northwest coast and back to Colorado, spanning altitudes from 100 to 7000 m MSL (see flight map in Figure S17). It should be stated that these derived relationships were done at pressures between 830 hPa and 350 hPa, which correspond to altitudes from approximately 1500m to 8000 m. Because the NCAR laboratories in Boulder are at 1625 m, it was not possible to measure actual flow rates at sea-level pressure, so the relationships for lower altitudes are extrapolated. Note that the nominal 30 ml min-1 capillary flow can deviate ~40% during flight, emphasizing the need for proper characterization. Particle number concentrations from this CPC as well as the model 3760A are presented in the main text of this manuscript.

Section S3: Supplementary tables and figures.

**Table S1:** Aristo 2016 flight summary. RF06 started on August 16 and went into the next day in UTC time, which is the reason the “Land” time is greater than 86400 s.

|  |  |  | Take off | | | | Land | | | |  |
| --- | --- | --- | --- | --- | --- | --- | --- | --- | --- | --- | --- |
| M/D | RF | Day of year | DDOY | Seconds in day | Time (UTC) | Time (MDT) | DDOY | Seconds in day | Time (UTC) | Time (MDT) | Duration (hours) |
| 8/5 | 01 | 218 | 218.68 | 59097 | 16:25 | 10:25 | 218.77 | 66830 | 18:33 | 12:33 | 2.15 |
| 8/8 | 02 | 221 | 221.63 | 54345 | 15:06 | 9:06 | 221.67 | 57507 | 15:58 | 9:58 | 0.88 |
| 8/9 | 03 | 222 | 222.66 | 57196 | 15:53 | 9:53 | 222.77 | 66355 | 18:26 | 12:26 | 2.54 |
| 8/10 | 04 | 223 | 223.64 | 55728 | 15:29 | 9:29 | 223.77 | 66441 | 18:27 | 12:27 | 2.98 |
| 8/12 | 05 | 225 | 225.80 | 69102 | 19:12 | 13:12 | 225.85 | 73439 | 20:24 | 14:24 | 1.20 |
| 8/16 | 06 | 229 | 229.63 | 54259 | 15:04 | 9:04 | 230.11 | 96163 | 2:43 | 20:43 | 11.64 |

**Table S2:** Diameter channels for ARISTO 2016 UHSAS instruments RU and WU. The boundaries in the table indicated by the thick black lines show the UHSAS diameters chosen that were combined so that the adjusted channels had approximately the same logarithmically-based diameter spacing as the SMPS as described in section 4.3. The total number of particles observed was the same between the original diameter channels and the adjusted ones. The grey area for each new size channel represents the mid-point diameter for comparison with the SMPS, and the first 3 groupings represent channels A, B and C (SMPS mid-point diameters of 62, 75 and 90 nm respectively; section 4.3).

| Rack-mounted UHSAS (RU); log10(Di+1/Di) = 0.013 | | | Wing-mounted UHSAS (RU); log10(Di+1/Di) = 0.012 | | |
| --- | --- | --- | --- | --- | --- |
| Start diam. (nm) | Mid diam. (nm) | End diam. (nm) | Start diam. (nm) | Mid diam. (nm) | End diam. (nm) |
| 55.0 | 55.8 | 56.6 | 60.0 | 60.9 | 61.7 |
| 56.6 | 57.5 | 58.3 | 61.7 | 62.6 | 63.5 |
| 58.3 | 59.2 | 60.0 | 63.5 | 64.4 | 65.3 |
| **60.0** | **60.9** | **61.8** | **65.3** | **66.3** | **67.2** |
| 61.8 | 62.8 | 63.7 | 67.2 | 68.2 | 69.2 |
| 63.7 | 64.6 | 65.6 | 69.2 | 70.2 | 71.1 |
| 65.6 | 66.5 | 67.5 | 71.1 | 72.2 | 73.2 |
| 67.5 | 68.5 | 69.5 | 73.2 | 74.3 | 75.3 |
| 69.5 | 70.6 | 71.6 | 75.3 | 76.4 | 77.5 |
| 71.6 | 72.7 | 73.7 | 77.5 | 78.6 | 79.7 |
| **73.7** | **74.8** | **75.9** | **79.7** | **80.9** | **82.0** |
| 75.9 | 77.0 | 78.2 | 82.0 | 83.2 | 84.4 |
| 78.2 | 79.3 | 80.5 | 84.4 | 85.6 | 86.8 |
| 80.5 | 81.7 | 82.9 | 86.8 | 88.1 | 89.3 |
| 82.9 | 84.1 | 85.3 | 89.3 | 90.6 | 91.9 |
| 85.3 | 86.6 | 87.9 | 91.9 | 93.2 | 94.5 |
| 87.9 | 89.2 | 90.5 | 94.5 | 95.9 | 97.3 |
| **90.5** | **91.8** | **93.2** | **97.3** | **98.7** | **100.1** |
| 93.2 | 94.6 | 96.0 | 100.1 | 101.5 | 103.0 |
| 96.0 | 97.4 | 98.8 | 103.0 | 104.4 | 105.9 |
| 98.8 | 100.3 | 101.8 | 105.9 | 107.4 | 109.0 |
| 101.8 | 103.3 | 104.8 | 109.0 | 110.5 | 112.1 |
| 104.8 | 106.3 | 107.9 | 112.1 | 113.7 | 115.3 |
| 107.9 | 109.5 | 111.1 | 115.3 | 117.0 | 118.7 |
| **111.1** | **112.8** | **114.4** | **118.7** | **120.4** | **122.1** |
| 114.4 | 116.1 | 117.8 | 122.1 | 123.9 | 125.6 |
| 117.8 | 119.6 | 121.3 | 125.6 | 127.4 | 129.2 |
| 121.3 | 123.1 | 124.9 | 129.2 | 131.1 | 133.0 |
| 124.9 | 126.8 | 128.6 | 133.0 | 134.9 | 136.8 |
| 128.6 | 130.5 | 132.5 | 136.8 | 138.8 | 140.7 |
| 132.5 | 134.4 | 136.4 | 140.7 | 142.8 | 144.8 |
| **136.4** | **138.4** | **140.4** | **144.8** | **146.9** | **149.0** |
| 140.4 | 142.5 | 144.6 | 149.0 | 151.1 | 153.3 |
| 144.6 | 146.8 | 148.9 | 153.3 | 155.5 | 157.7 |
| 148.9 | 151.1 | 153.4 | 157.7 | 160.0 | 162.2 |
| 153.4 | 155.6 | 157.9 | 162.2 | 164.6 | 166.9 |
| 157.9 | 160.3 | 162.6 | 166.9 | 169.3 | 171.7 |
| 162.6 | 165.0 | 167.4 | 171.7 | 174.2 | 176.7 |
| **167.4** | **169.9** | **172.4** | **176.7** | **179.2** | **181.7** |
| 172.4 | 175.0 | 177.5 | 181.7 | 184.4 | 187.0 |
| 177.5 | 180.2 | 182.8 | 187.0 | 189.7 | 192.4 |
| 182.8 | 185.5 | 188.3 | 192.4 | 195.2 | 197.9 |
| 188.3 | 191.1 | 193.9 | 197.9 | 200.8 | 203.6 |
| 193.9 | 196.7 | 199.6 | 203.6 | 206.6 | 209.5 |
| 199.6 | 202.6 | 205.6 | 209.5 | 212.5 | 215.5 |
| **205.6** | **208.6** | **211.7** | **215.5** | **218.7** | **221.8** |
| 211.7 | 214.8 | 218.0 | 221.8 | 225.0 | 228.1 |
| 218.0 | 221.2 | 224.4 | 228.1 | 231.4 | 234.7 |
| 224.4 | 227.8 | 231.1 | 234.7 | 238.1 | 241.5 |
| 231.1 | 234.5 | 238.0 | 241.5 | 245.0 | 248.4 |
| 238.0 | 241.5 | 245.1 | 248.4 | 252.0 | 255.6 |
| 245.1 | 248.7 | 252.3 | 255.6 | 259.3 | 263.0 |
| **252.3** | **256.1** | **259.8** | **263.0** | **266.8** | **270.6** |
| 259.8 | 263.7 | 267.6 | 270.6 | 274.5 | 278.4 |
| 267.6 | 271.5 | 275.5 | 278.4 | 282.4 | 286.4 |
| 275.5 | 279.6 | 283.7 | 286.4 | 290.5 | 294.6 |
| 283.7 | 287.9 | 292.1 | 294.6 | 298.9 | 303.1 |
| 292.1 | 296.5 | 300.8 | 303.1 | 307.5 | 311.9 |
| 300.8 | 305.3 | 309.8 | 311.9 | 316.4 | 320.9 |
| **309.8** | **314.4** | **319.0** | **320.9** | **325.5** | **330.1** |
| 319.0 | 323.7 | 328.5 | 330.1 | 334.9 | 339.6 |
| 328.5 | 333.4 | 338.2 | 339.6 | 344.5 | 349.4 |
| 338.2 | 343.3 | 348.3 | 349.4 | 354.5 | 359.5 |
| 348.3 | 353.5 | 358.6 | 359.5 | 364.7 | 369.9 |
| 358.6 | 364.0 | 369.3 | 369.9 | 375.2 | 380.5 |
| 369.3 | 374.8 | 380.3 | 380.5 | 386.0 | 391.5 |
| **380.3** | **386.0** | **391.6** | **391.5** | **397.1** | **402.8** |
| 391.6 | 397.4 | 403.2 | 402.8 | 408.6 | 414.4 |
| 403.2 | 409.2 | 415.2 | 414.4 | 420.4 | 426.3 |
| 415.2 | 421.4 | 427.6 | 426.3 | 432.5 | 438.6 |
| 427.6 | 433.9 | 440.3 | 438.6 | 444.9 | 451.3 |
| 440.3 | 446.8 | 453.4 | 451.3 | 457.8 | 464.3 |
| 453.4 | 460.1 | 466.9 | 464.3 | 471.0 | 477.6 |
| **466.9** | **473.8** | **480.7** | **477.6** | **484.5** | **491.4** |
| 480.7 | 487.9 | 495.0 | 491.4 | 498.5 | 505.6 |
| 495.0 | 502.4 | 509.8 | 505.6 | 512.9 | 520.2 |
| 509.8 | 517.3 | 524.9 | 520.2 | 527.7 | 535.1 |
| 524.9 | 532.7 | 540.5 | 535.1 | 542.9 | 550.6 |
| 540.5 | 548.5 | 556.6 | 550.6 | 558.5 | 566.4 |
| 556.6 | 564.9 | 573.1 | 566.4 | 574.6 | 582.8 |
| **573.1** | **581.7** | **590.2** | **582.8** | **591.2** | **599.6** |
| 590.2 | 598.9 | 607.7 | 599.6 | 608.2 | 616.9 |
| 607.7 | 616.7 | 625.8 | 616.9 | 625.7 | 634.6 |
| 625.8 | 635.1 | 644.4 | 634.6 | 643.8 | 652.9 |
| 644.4 | 654.0 | 663.5 | 652.9 | 662.3 | 671.8 |
| 663.5 | 673.4 | 683.3 | 671.8 | 681.4 | 691.1 |
| 683.3 | 693.4 | 703.6 | 691.1 | 701.1 | 711.0 |
| **703.6** | **714.0** | **724.5** | **711.0** | **721.3** | **731.5** |
| 724.5 | 735.3 | 746.0 | 731.5 | 742.1 | 752.6 |
| 746.0 | 757.1 | 768.2 | 752.6 | 763.5 | 774.3 |
| 768.2 | 779.6 | 791.1 | 774.3 | 785.5 | 796.6 |
| 791.1 | 802.8 | 814.6 | 796.6 | 808.1 | 819.6 |
| 814.6 | 826.7 | 838.8 | 819.6 | 831.4 | 843.2 |
| 838.8 | 851.3 | 863.7 | 843.2 | 855.4 | 867.5 |
| **863.7** | **876.6** | **889.4** | **867.5** | **880.0** | **892.5** |
| 889.4 | 902.6 | 915.9 | 892.5 | 905.4 | 918.3 |
| 915.9 | 929.5 | 943.1 | 918.3 | 931.5 | 944.7 |
| 943.1 | 957.1 | 971.1 | 944.7 | 958.3 | 971.9 |
| 971.1 | 985.6 | 1000.0 | 971.9 | 985.9 | 1000.0 |

Table S3 - Level-flight and cloud-free segments of RF02 to RF06 used to evaluate UHSAS particle concentration ratios (NRU/NWU). Grey shading is used to delineate the different flights analyzed.

| Flight | Start UTC, HH:MM | Stop UTC HH:MM | MSL  Altitude a,  km | Number of  NRU/NWU  Ratios  in segment |
| --- | --- | --- | --- | --- |
| RF02 | 15:31 | 15:36 | 2.10 | 99 |
| RF02 | 15:39 | 15:44 | 2.42 | 98 |
| RF02 | 15:51 | 15:54 | 2.26 | 59 |
| RF03 | 16:12 | 16:18 | 2.43 | 118 |
| RF03 | 16:52 | 17:01 | 1.98 | 17 |
| RF03 | 17:45 | 17:51 | 3.89 | 8 |
| RF03 | 18:11 | 18:17 | 4.11 | 119 |
| RF04 | 15:46 | 15:56 | 4.85 | 172 |
| RF04 | 16:18 | 16:30 | 2.91 | 206 |
| RF04 | 16:39 | 16:42 | 5.02 | 37 |
| RF05 | 19:17 | 19:18 | 3.59 | 14 |
| RF05 | 19:33 | 19:42 | 5.53 | 179 |
| RF05 | 19:55 | 19:59 | 5.52 | 79 |
| RF06 | 21:22 | 21:26 | 0.08 | 79 |
| RF06 | 22:01 | 22:06 | 1.18 | 99 |
| RF06 | 22:12 | 22:19 | 3.01 | 123 |
| RF06 | 22:23 | 22:28 | 3.93 | 99 |
| RF06 | 22:37 | 22:43 | 4.57 | 117 |
| RF06 | 23:03 | 23:05 | 5.21 | 39 |
| RF06 | 23:28 | 23:33 | 5.83 | 99 |
| RF06 | 00:35 | 00:40 | 6.45 | 99 |

aAltitudes were calculated using the segment-averaged C-130 static pressure and the ICAO Standard Atmosphere (1993).

**Figure S1**: Panel A shows the Hiaper Modular Inlet (HIMIL) on the left and Sub-Micron Aerosol Inlet (SMAI) on the right mounted on the bottom of the NSF NCAR C130 aircraft during ARISTO 2016. Air flow direction is towards the right as shown by the red arrows. Panel B shows the internal structures of the two inlets.


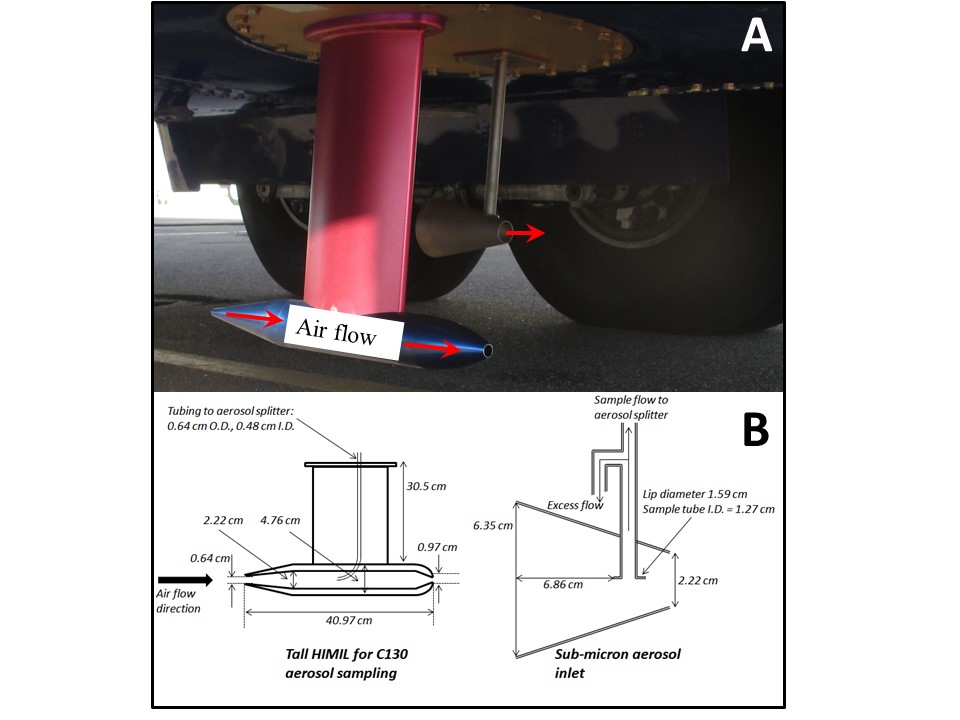


**Figure S2:** SMPS system flows in and out of the DMA at varying operating pressures. Each of the four flow paths are shown in Figure 1 in the main manuscript.

**Figure S3:** DMA voltage and mobility diameter relationship with nano-DMA (TSI model 3085) using a sampling temperature of 22 °C, and keeping sheath and excess flows at 3.3 L min-1.

**
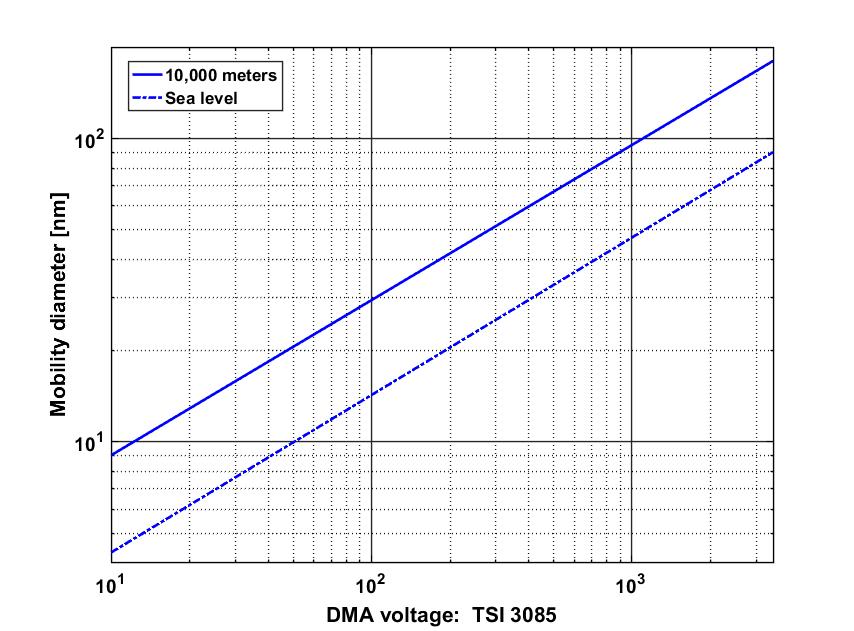
**

**Figure S4:** Altitude, condenser, sheath, and capillary flows in the TSI 3025A during ARISTO 2016 RF06. The condenser flow (nominally 300 ml min-1) is split in a ~9:1 ratio between the particle-free sheath flow and the capillary flow.

**Figure S5**: Time series of *ΔN/Δlog10D* values from SMPS and RU for channels A, B and C during ARISTO RF02 on August 8, 2016. This is similar to Figures 6 and 7 in the main manuscript and discussed in section 4.3.


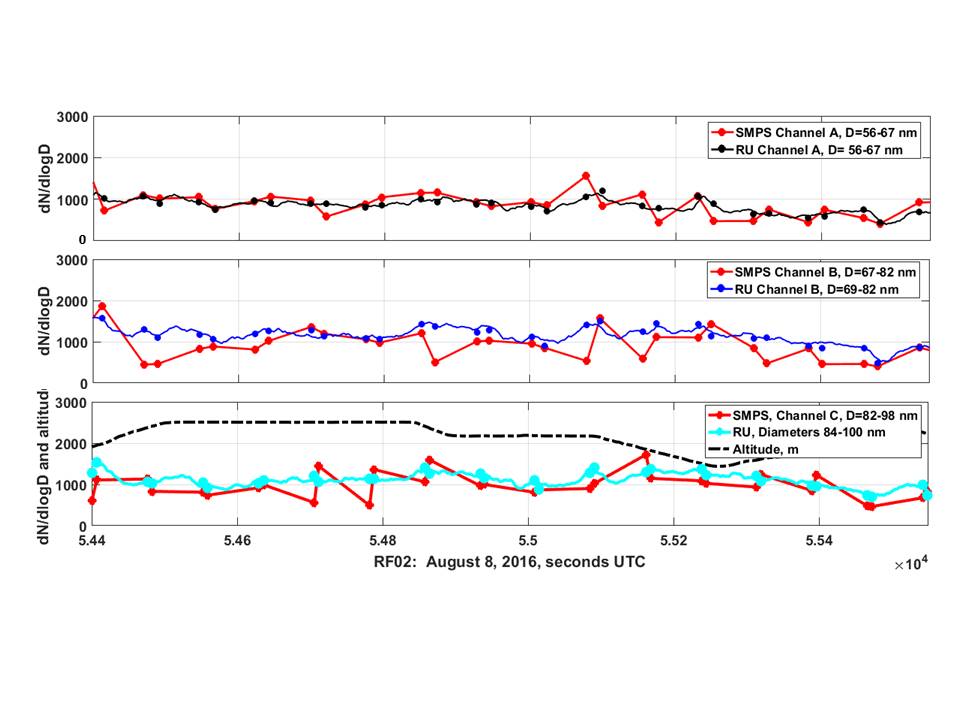


**Figure S6:** Time series of *ΔN/Δlog10D* values from SMPS and RU for channels A, B and C during ARISTO RF03 on August 9, 2016. This is similar to Figures 6 and 7 in the main manuscript and discussed in section 4.3.


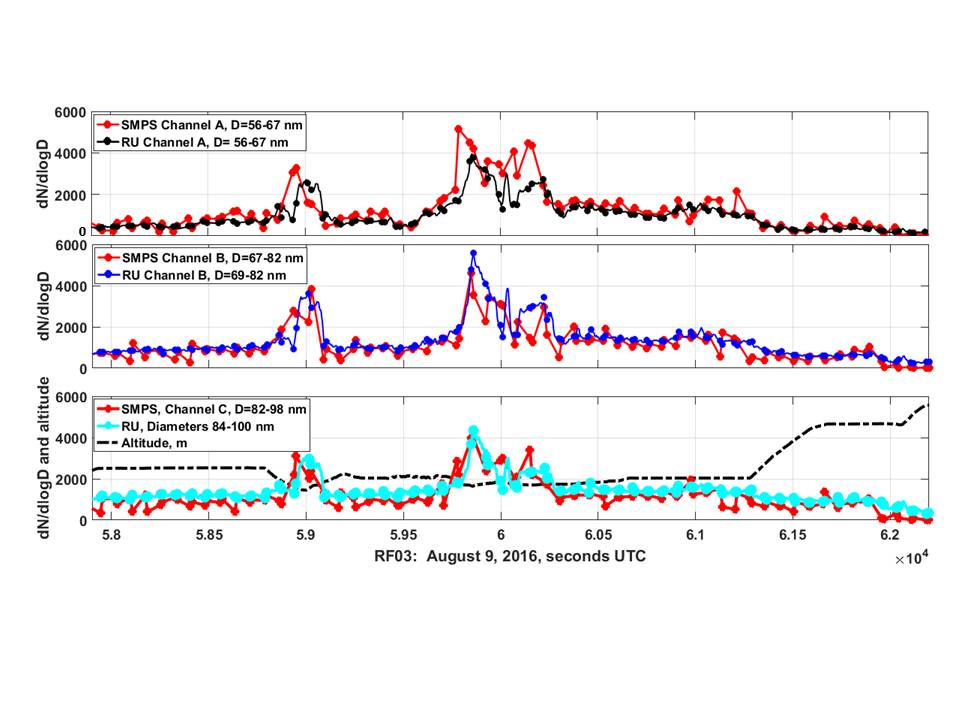


**Figure S7:** Time series of *ΔN/Δlog10D* values from SMPS and RU for channels A, B and C during ARISTO RF04 on August 10, 2016. This is similar to Figures 6 and 7 in the main manuscript and discussed in section 4.3.


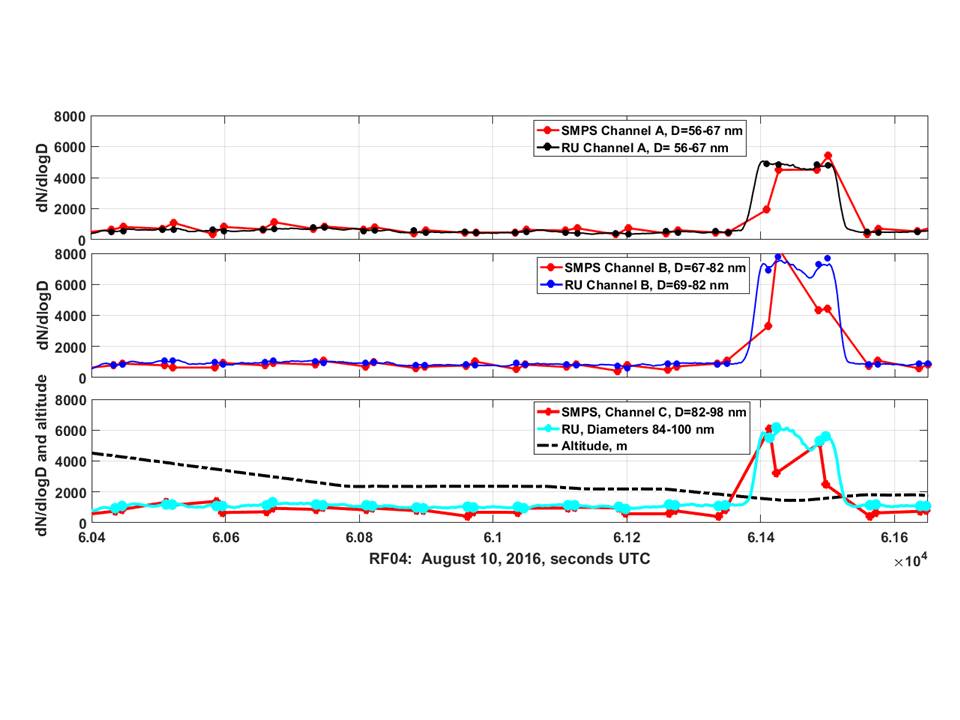


Figures S8-S14 below show additional examples of particle concentrations measured during inlet switching during the ARISTO 2016 campaign. These provide additional examples of what is presented in Figure 10 in the main manuscript. More specific details about this data are included in Table S4 below. In Figure 11S, we make similar comparisons using a subset of the RU data. Here, we specifically used the Wilcoxon Rank-Sum test to evaluate the hypothesis that particle sizes greater than 400 nm are transmitted with equal efficiency through the HIMIL and the SMAI. In all five cases the null hypothesis was accepted (p>0.05). In other words, the median values before and after the switch are indistinguishable for this large-particle subset of the UHSAS-measured particle concentrations.

**Table S4:** Inlet switch comparison periods during ARISTO 2016.

| Flight (Figure) | Date (2016) | Start period* (Time UTC) | End period (Time UTC) | Comment |
| --- | --- | --- | --- | --- |
| RF01 (N/A) | August 5 | N/A** | N/A | Only SMAI inlet used |
| RF02 (N/A) | August 8 | N/A | N/A | Insufficient data |
| RF03 (Fig. 10) | August 9 | 16:27:50 | 16:36:29 | Main manuscript |
| RF04 (Fig. S8) | August 10 | 17:16:48 | 18:14:24 | 2 inlet switches |
| RF04 (Fig. S9) | August 10 | 17:14:38 | 17:34:05 | HIMIL→SMAI (Fig. S8 close-up) |
| RF04 (Fig. S10) | August 10 | 18:05:46 | 18:14:24 | SMAI→HIMIL (Fig. S8 close-up) |
| RF05 (Fig. S11) | August 12 | 19:33:36 | 20:16:48 | 2 inlet switches |
| RF05 (Fig. S12) | August 12 | 19:36:29 | 19:41:31 | HIMIL→SMAI (Fig. S11 close-up) |
| RF05 (Fig. S13) | August 12 | 20:11:02 | 20:16:48 | SMAI→HIMIL (Fig. S11 close-up) |
| RF03, 04, 05 (Fig. S14) | August 9, 10, 12 | See Fig. S14 | See Fig. S14 | Rack-mounted UHSAS particle concentrations for D>400 nm. |
| RF06 (N/A) | August 16 | N/A | N/A | Only SMAI inlet used |

**Start and end period refers to the time surrounding the inlet switches shown in Figures 10 and S8-S14.

**N/A values indicate that either the inlet was not switched during the flight or that the switch was made during changing conditions (i.e. during landing) preventing a valid comparison between the two inlets.

**Figure S8:** Integrated particle concentration comparison during inlet switches of RF04 on August 10, 2016. The figure below shows particle concentrations from the wing-mounted and rack-mounted UHSAS, SMPS using the regular DMA and TSI 3760A. The TSI 3025 did not operate during this flight. It should also be noted that the wing-mounted UHSAS (solid blue line) stopped operating shortly after the first inlet switch because the summer-time low altitude observations (2000 m ASL, ~ 300 m above ground) caused excess temperature in WU. The original inlet was the HIMIL and was switched to the SMAI and then switched back as indicated by the arrows and text boxes.


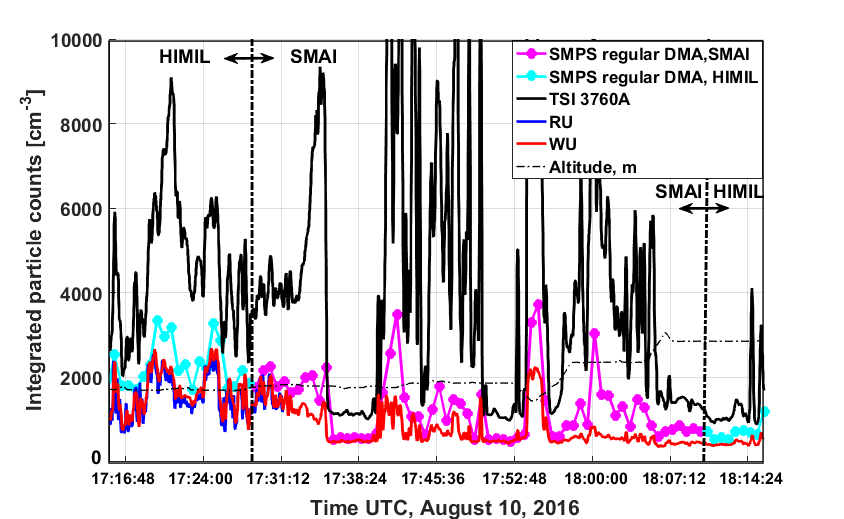


**Figure S9:** Integrated particle concentration comparison during the inlet switch of RF04 on August 10, 2016. This is the same data shown in Figure S8, but decreasing the width of the x-axis so that the individual points can be seen more easily during the first inlet switch (HIMIL → SMAI). The RU did not operate after 17:31:20 during this flight.


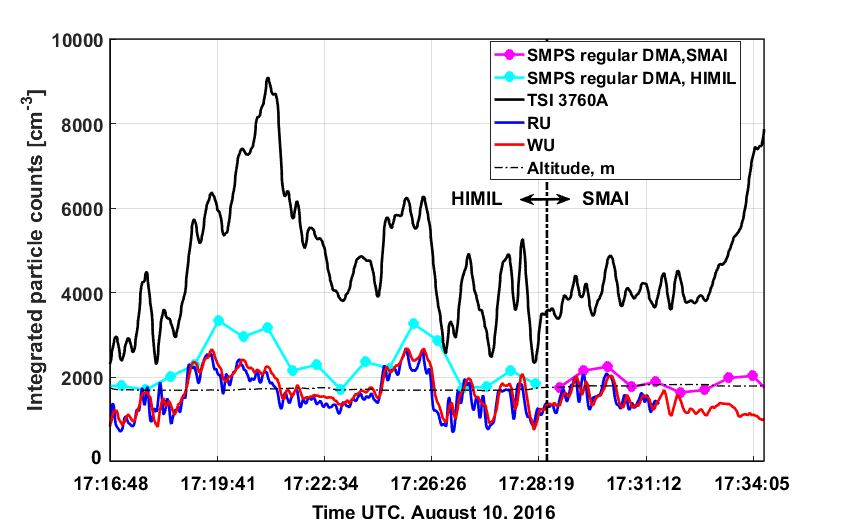


**Figure S10:** Integrated particle concentration comparison during the second inlet switch of RF04 on August 10, 2016. This is the same data shown in Figure S8, but decreasing the width of the x-axis so that the individual points can be seen more easily during the second inlet switch (SMAI → HIMIL). The RU did not operate during this portion of the flight.

**
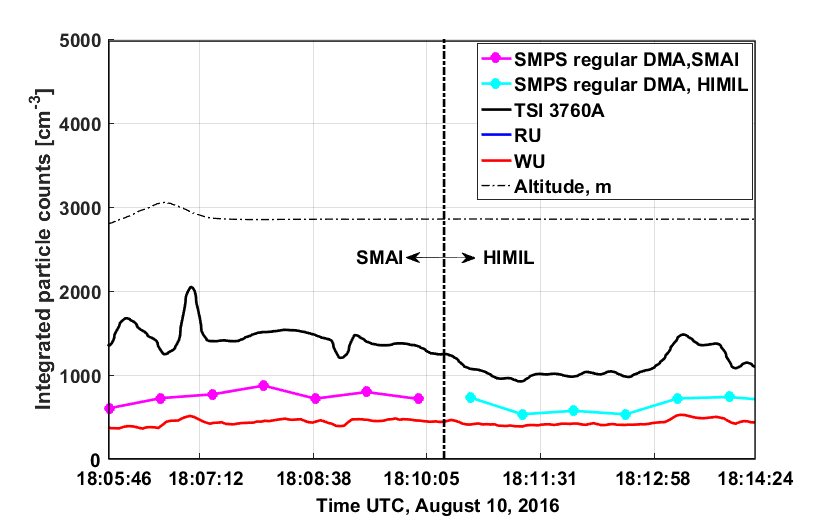
**

**Figure S11:** Integrated particle concentration comparison during inlet switches of RF05 on August 12, 2016. The figure below shows particle concentrations from the wing-mounted and rack-mounted UHSAS, SMPS using the nano-DMA, TSI 3025 and TSI 3760A. The original inlet was the SMAI and was switched to the HIMIL and then switched back as indicated by the arrows and text boxes.


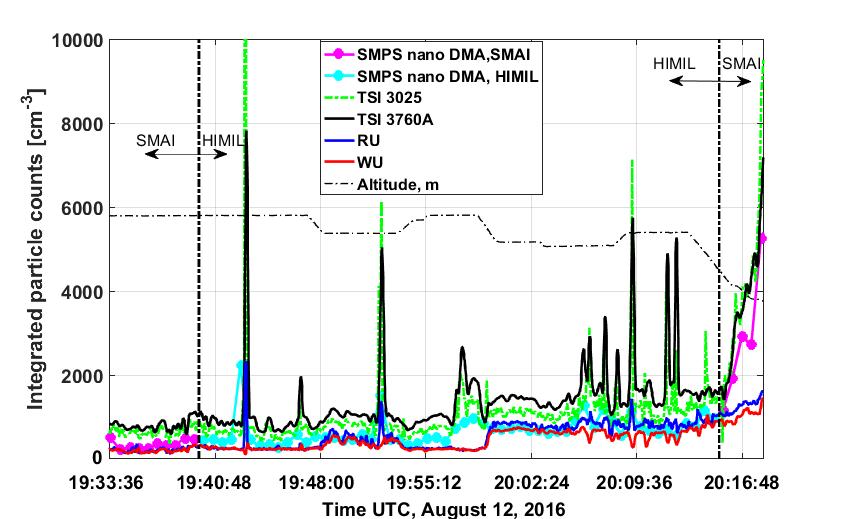


**Figure S12:** Integrated particle concentration comparison during the first inlet switch of RF05 on August 12, 2016. This is the same data shown in Figure S11, but decreasing the width of the x-axis so that the individual points can be seen more easily during the first inlet switch (SMAI → HIMIL).


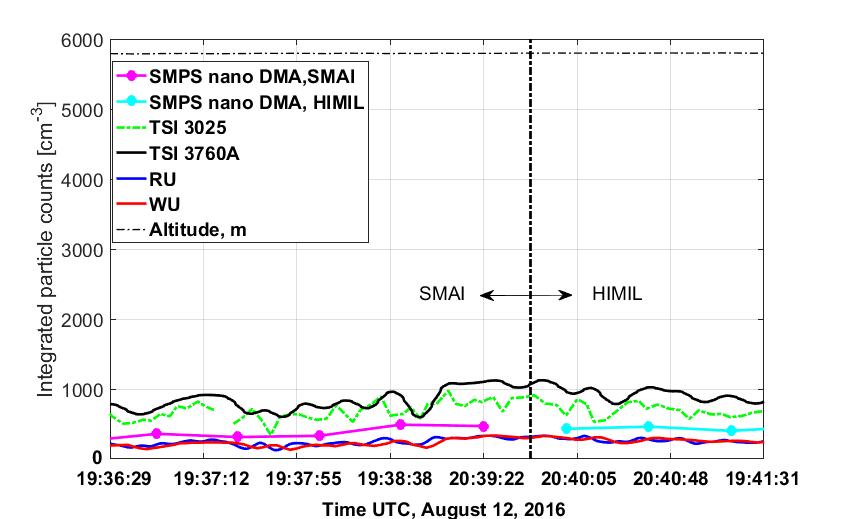


**Figure S13:** Integrated particle concentration comparison during the inlet switch of RF05 on August 12, 2016. This is the same data shown in Figure S11, but decreasing the width of the x-axis so that the individual points can be seen more easily during the second inlet switch (HIMIL → SMAI).


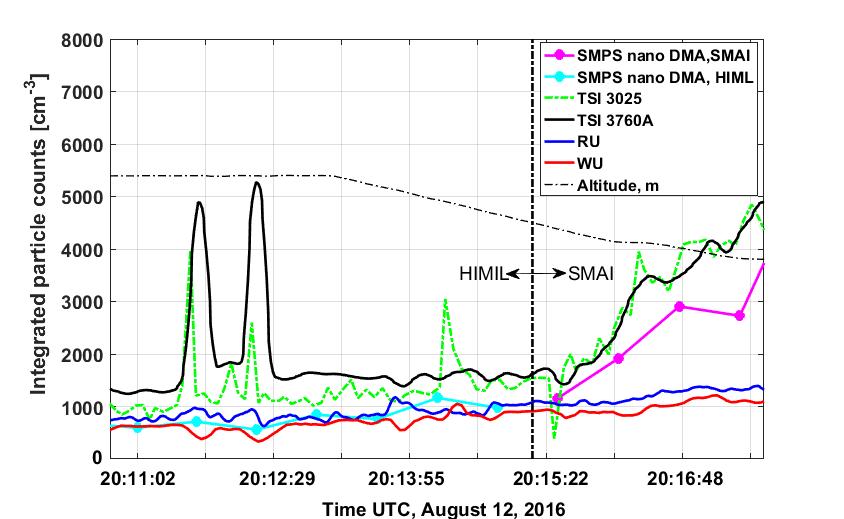


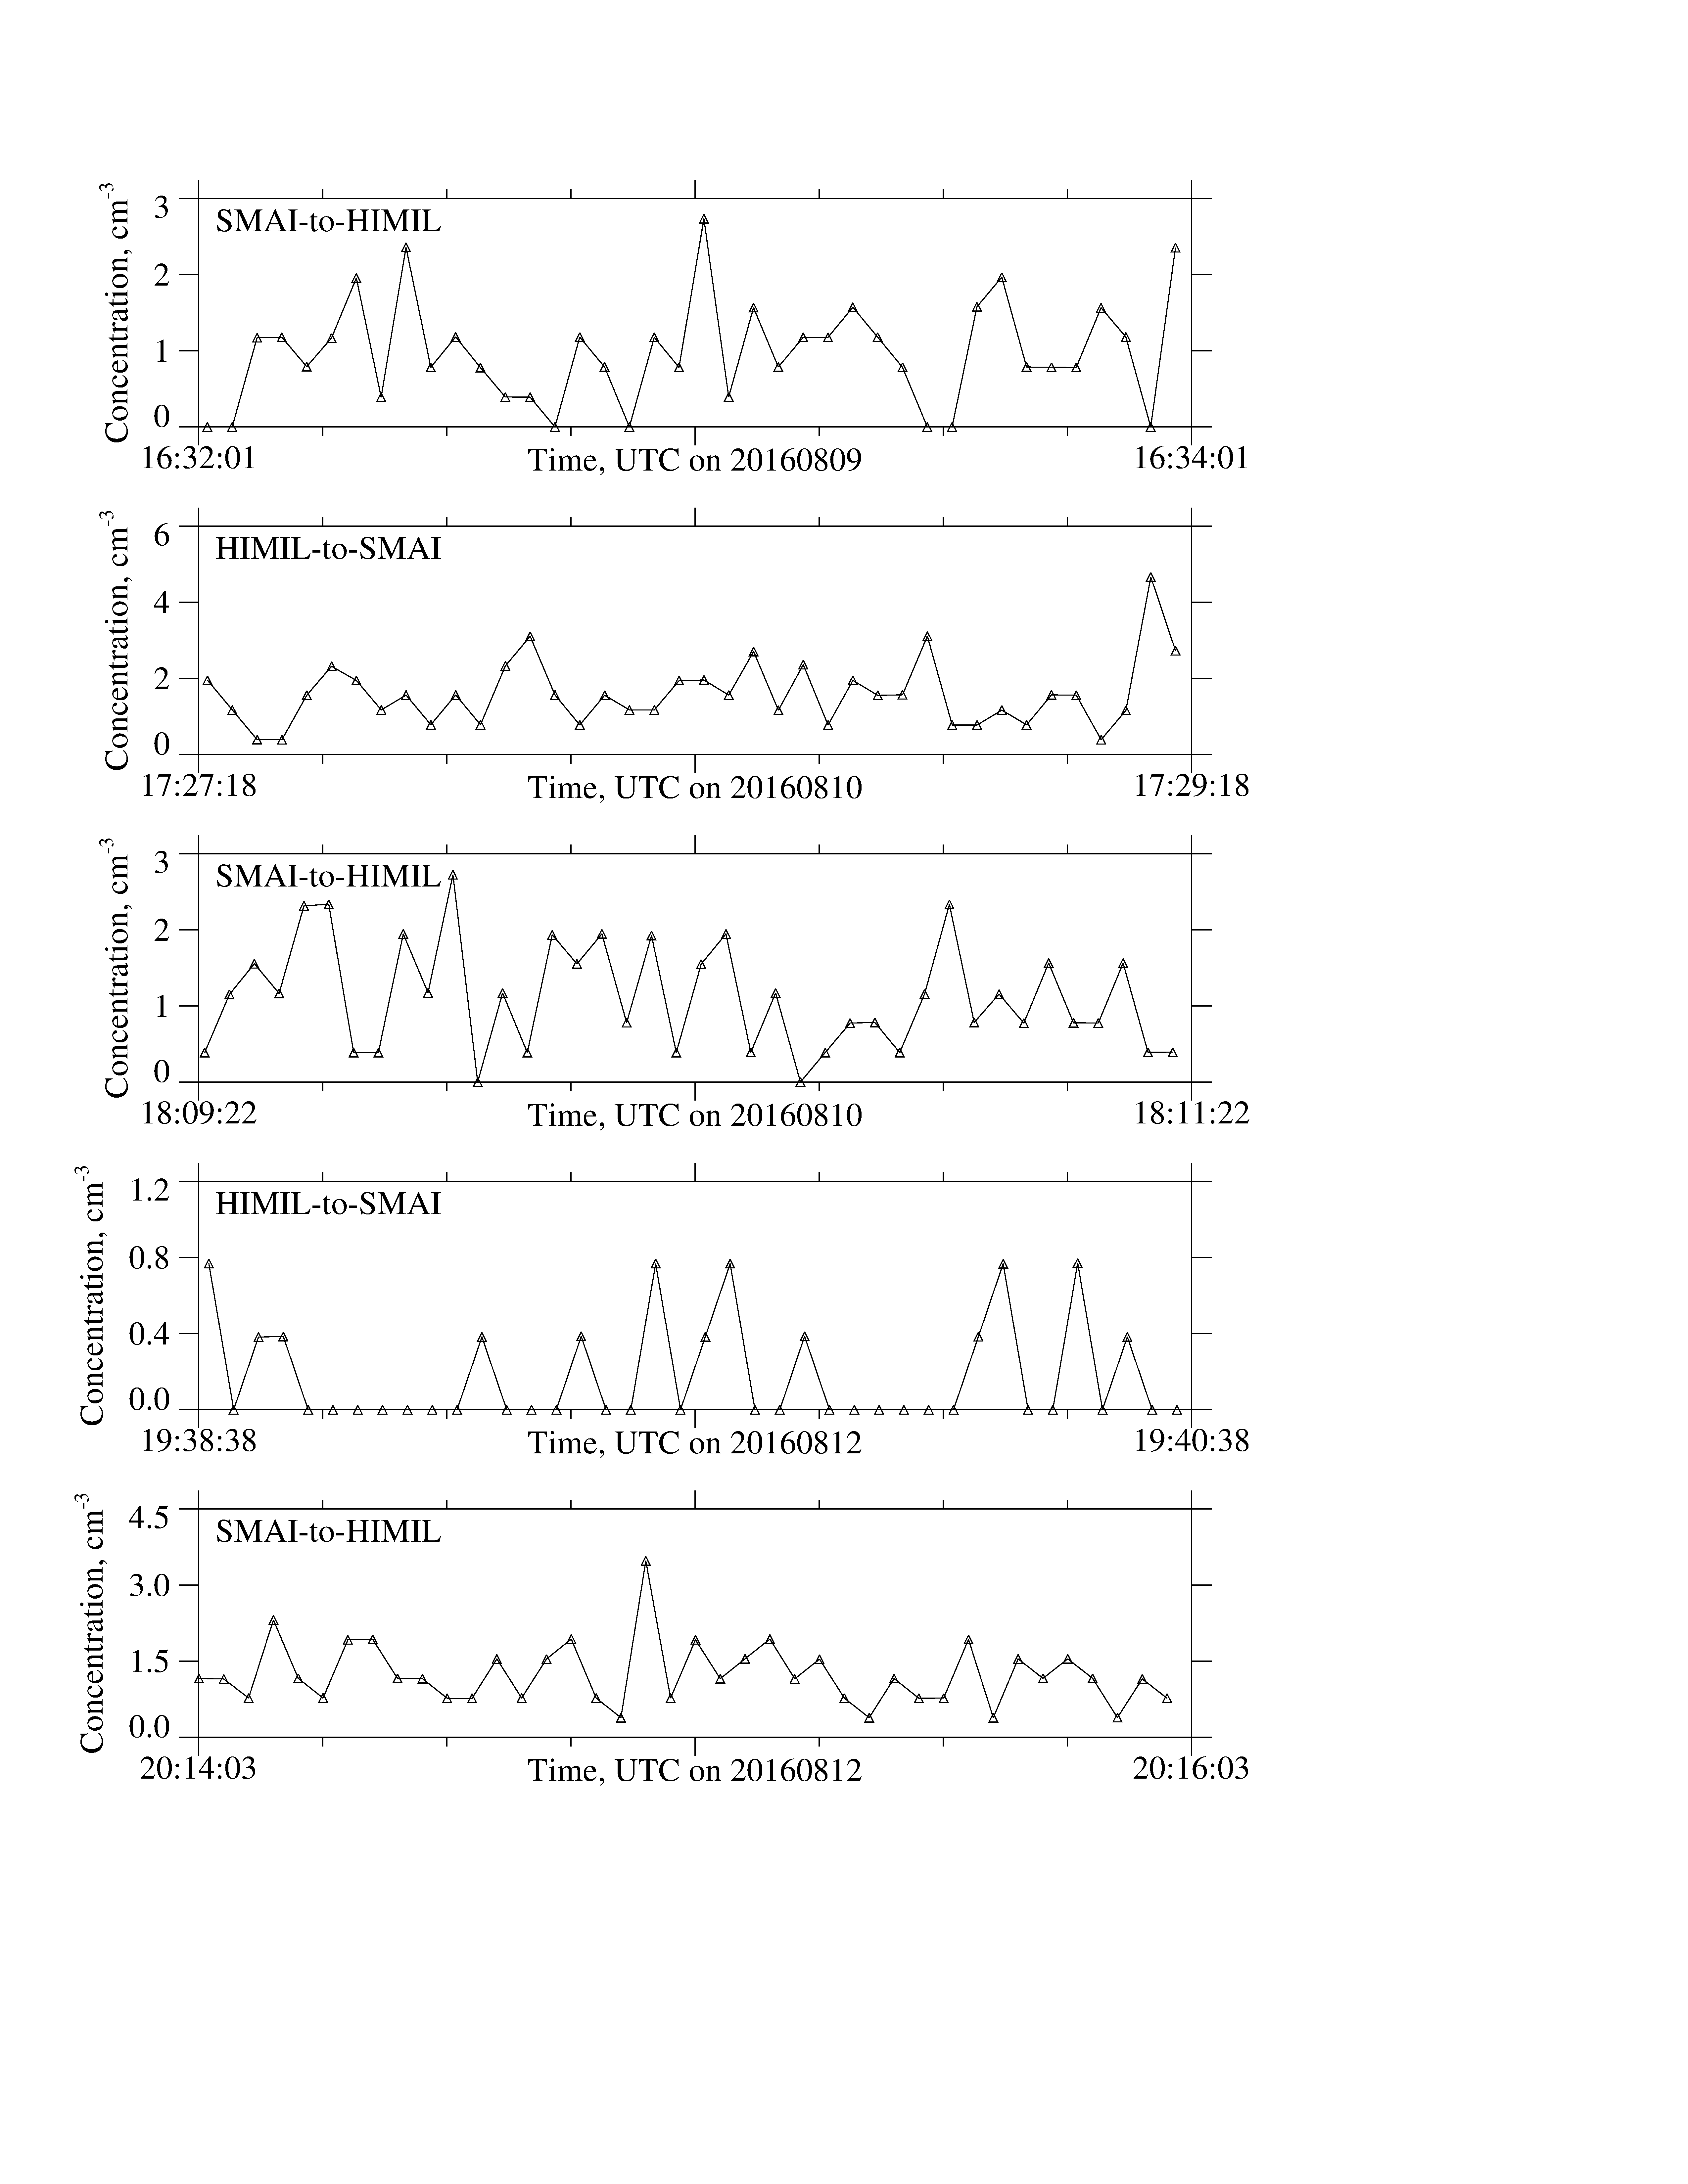
**Figure S14:** Particle number concentrations for D>400 nm measured by the rack-mounted UHSAS before and after the inlet switching during RF03, RF04 and RF05. Each panel has 120 s (2 minutes) of measurements centered on the time that the inlet was switched. Concentrations from 60 s to 15 s before the switch and 15 s to 60 s after the switch were averaged. We evaluated the median values around the switch using the non-parametric Wilcoxon Rank-Sum Test. In each of the cases, the medians are statistically indistinguishable (p<0.05). The inlet switches are shown in the order presented in Table S4 and the label written inside the panels indicates the direction of each switch.

**Figure S15**: Flight path for RF01 on August 5, 2016 (16:24-18:33 UTC). The colors indicate altitude (in meters) as indicated on the right, and the size of the circles corresponds to total particle concentration as recorded by the TSI 3025 CPC. The NCAR Research Aviation Facility (RAF) located at the Rocky Mountain Metropolitan Airport is shown by the yellow square.

**Figure S16:** Flight path for RF02 on August 8, 2016 (15:05-15:58 UTC). The colors indicate altitude (in meters) as indicated on the right, and the size of the circles corresponds to total particle concentration as recorded by the TSI 3025 CPC. The NCAR Research Aviation Facility (RAF) located at the Rocky Mountain Metropolitan Airport is shown by the yellow square.

**Figure S17:** Flight path for RF03 on August 9, 2016 (15:53-18:25 UTC). The colors indicate altitude (in meters) as indicated on the right, and the size of the circles corresponds to total particle concentration as recorded by the TSI 3025 CPC. The NCAR Research Aviation Facility (RAF) located at the Rocky Mountain Metropolitan Airport is shown by the yellow square.

**Figure S18:** Flight path for RF04 on August 10, 2016 (15:28-18:27 UTC). The colors indicate altitude (in meters) as indicated on the right, and the size of the circles corresponds to total particle concentration as recorded by the TSI 3025 CPC. The NCAR Research Aviation Facility (RAF) located at the Rocky Mountain Metropolitan Airport is shown by the yellow square.

**Figure S19:** Flight path for RF05 on August 12, 2016 (19:11-20:24 UTC). The colors indicate altitude (in meters) as indicated on the right, and the size of the circles corresponds to total particle concentration as recorded by the TSI 3025 CPC. The NCAR Research Aviation Facility (RAF) located at the Rocky Mountain Metropolitan Airport is shown by the yellow square.

**Figure S20:** Flight path for RF06 on August 16-17, 2016 (15:04-2:24 UTC). The colors indicate altitude (in meters) as indicated on the right, and the size of the circles corresponds to total particle concentration as recorded by the TSI 3025 CPC. The NCAR Research Aviation Facility (RAF) located at the Rocky Mountain Metropolitan Airport is shown by the yellow square.

**Figure S21:** ARISTO 2016 RF05 size particle size distributions from the SMPS and 2 UHSAS instruments between 72316 and 72286 s (midpoint 72301 s = 20:05 UTC) on August 12, 2016. This is the same data used in panel iii of Figure 6, but enlarged here to clarify the individual curves. The dashed red curve is the nano-SMPS data. The grey- and cyan-colored bands are the mean and standard deviations of the UHSAS measurements over the 30 second measurement period. The dark blue and black lines with pentagram symbols are the mean values that have been “corrected” using an average of the two corrections described in Kupc et al. (2018). The correction for particles greater than 80 nm is 4% or less, which is the reason that the dark lines with symbols and shaded areas are essentially the same for these larger particles (~90-1000 nm).


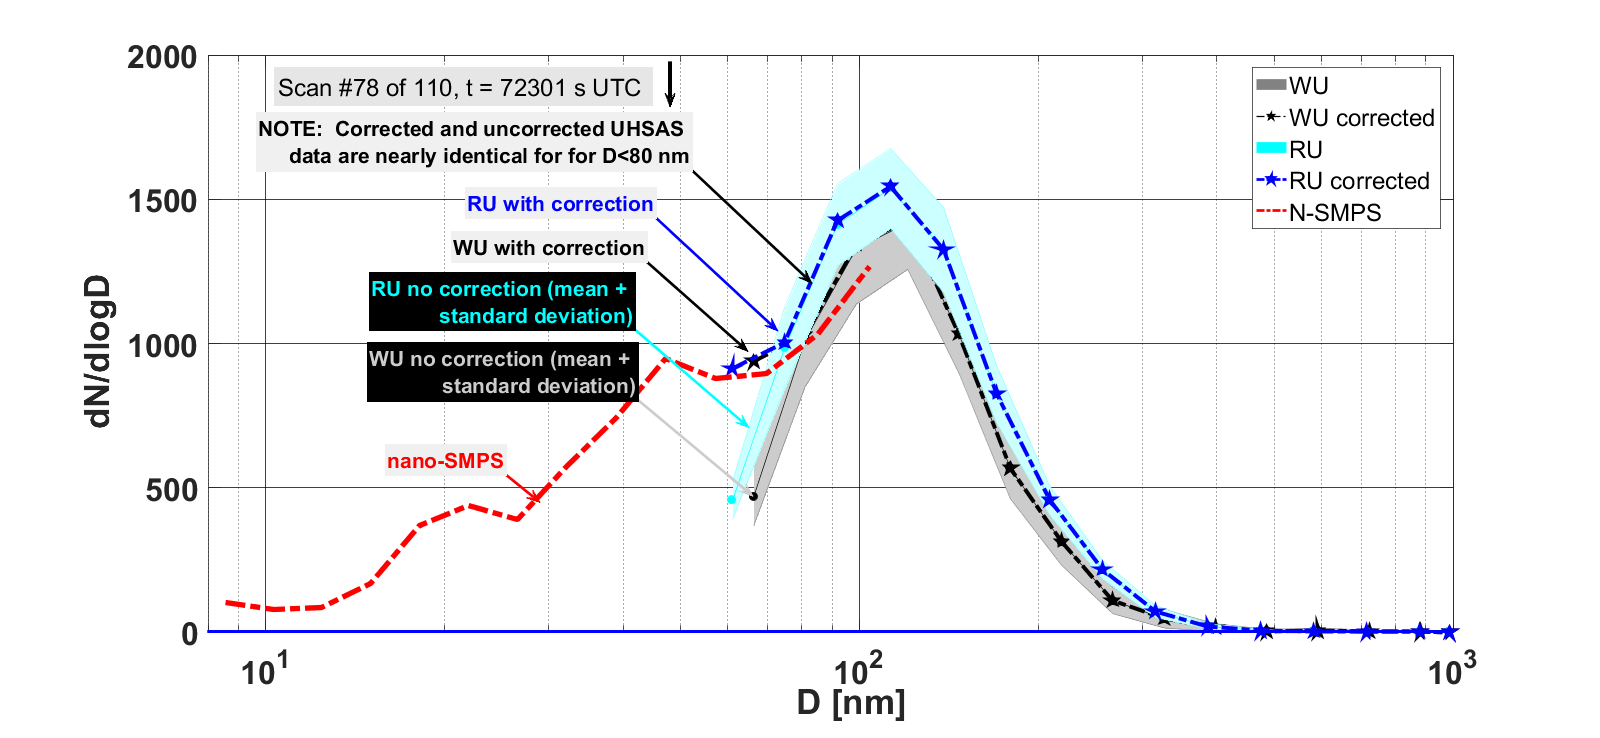


**Figure S22:** Estimated UHSAS counting efficiency used for Figures 6 and S21. The data shown are adapted from Kupc et al. (2018).


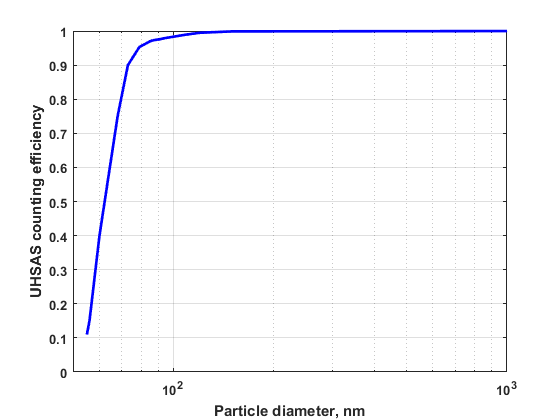


**References for Supplementary Information Section**

Hermann, M., and A. Wiedensohler. 2001. Counting efficiency of condensation particle counters at low-pressures with illustrative data from the upper troposphere. *Journal of Aerosol Science* 32 (8):975-991. doi: 10.1016/s0021-8502(01)00037-4.

International Civil Aviation Organization (ICAO). 1993. Manual of the ICAO Standard Atmosphere: extended to 80 kilometres (262,500 feet), 3rd ed., ISBN-92-9194-004-6.

Kupc, A., C. Williamson, N. L. Wagner, M. Richardson, C. A. Brock. 2018. Modification, calibration, and performance of the Ultra-High Sensitivity Aerosol Spectrometer for particle size distribution and volatility measurements during the Atmospheric Tomography Mission (ATom) airborne campaign. *Atmospheric Measurement Techniques* 11:369-383.

Martin, C. National Center for Atmospheric Research, Earth Observing Laboratory (NCAR EOL) publication (2015); Accessed August 23, 2018. <https://www.eol.ucar.edu/system/files/Proxy%20User%20Guide.pdf>

Seifert, M., R. Tiede, M. Schnaiter, C. Linke, O. Mohler, U. Schurath, and J. Strom. 2004. Operation and performance of a differential mobility particle sizer and a TSI 3010 condensation particle counter at stratospheric temperatures and pressures. *Journal of Aerosol Science* 35 (8):981-993. doi: 10.1016/j.jaerosci.2004.03.002.

Stolzenburg, M. R., and P. H. McMurry. 1991. AN ULTRAFINE AEROSOL CONDENSATION NUCLEUS COUNTER. *Aerosol Science and Technology* 14 (1):48-65. doi: 10.1080/02786829108959470.

Stolzenburg, M. R., and P. H. McMurry. 2008. Equations governing single and tandem DMA configurations and a new lognormal approximation to the transfer function. *Aerosol Science and Technology* 42 (6):421-432. doi: 10.1080/02786820802157823.

Takegawa, Nobuyuki, Kenjiro Iida, and Hiromu Sakurai. 2017. Modification and laboratory evaluation of a TSI ultrafine condensation particle counter (Model 3776) for airborne measurements. *Aerosol Science and Technology* 51 (2):235-245. doi: 10.1080/02786826.2016.1261990.

Wiedensohler, A. 1988. AN APPROXIMATION OF THE BIPOLAR CHARGE-DISTRIBUTION FOR PARTICLES IN THE SUB-MICRON SIZE RANGE. *Journal of Aerosol Science* 19 (3):387-389. doi: 10.1016/0021-8502(88)90278-9.
